# Supplementary material for: Access channel residues Ser315 and Asp137 in Mycobacterium tuberculosis catalase-peroxidase (KatG) control peroxidatic activation of the pro-drug isoniazid
Source: Royal Society of Chemistry journal article supplement (doi:10.1039/c3cc47022a), 2013-01-01
Supplement: c3cc47022a.pdf [file c3cc47022a.pdf]

## **Supplementary Information**

### **Access channel residues Ser315 and Asp137 in *Mycobacterium tuberculosis* catalase-peroxidase (KatG) control peroxidatic activation of the *pro*-drug isoniazid**

**Xiangbo Zhao,<sup>a</sup> Hans-Petter Hersleth,<sup>b</sup> Janan Zhu,<sup>c</sup> K. Kristoffer Andersson<sup>\*b</sup> and Richard S. Magliozzo<sup>\*a</sup>**

<sup>a</sup> *Department of Chemistry, Brooklyn College and The Graduate Center of The City University of New York, 2900 Bedford Avenue, Brooklyn, NY 11210 USA Fax: 718 951 4607; Tel: 718 951 5000 X2845; E-mail: rmaglioz@brooklyn.cuny.edu*

<sup>b</sup> *Department of Biosciences, University of Oslo, P.O.Box 1066 Blindern, NO-0316 Oslo, Norway. . Fax: +47 2285 4726; Tel: +47 2285 6625; E-mail: k.k.andersson@ibv.uio.no*

<sup>c</sup> *Current address, Duke University, Durham, NC, 27705 USA*

## Experimental section.

1. Overexpression of recombinant *M. tuberculosis* (*M.tb*) WT KatG and its mutant enzymes, and their purification were performed as described in previous reports;<sup>1</sup> the heme precursor  $\delta$ -aminolevulinic acid (200  $\mu$ M) was added to culture media immediately after inducing to promote formation of holo-enzyme. KatG concentration is expressed as the heme concentration based on the pyridine hemochromogen assay.

2. The rates of IN-NAD adduct generation with varying concentrations of INH were examined directly in a spectrophotometric assay according to our previous protocol<sup>2</sup> with minor modifications. All reactions were performed at room temp in 20mM potassium phosphate buffer (pH 7.2) containing 0.1 mM EDTA. The assay mixture contains: KatG (1  $\mu$ M),  $\text{NAD}^+$  (200  $\mu$ M), Glucose Oxidase ( $\sim$ 15 mU/mL, generating 3.0  $\mu$ M/min  $\text{H}_2\text{O}_2$ ), and glucose (5 mM). To monitor adduct formation, the absorbance at 326 nm was recorded for 10 min after the addition of glucose. The concentration of IN-NAD adduct was calculated according to its extinction coefficient ( $\epsilon_{326\text{ nm}} = 6900\text{M}^{-1}\text{cm}^{-1}$ ).<sup>3,4</sup> The reference cuvette contained all components except  $\text{NAD}^+$  to correct for background. The rate of adduct formation was computed from the absorbance change recorded during the first 10 min.

3. KatG[Asp137Ser] and KatG[Arg418Leu] were crystallized under conditions similar to those previously reported.<sup>5</sup> The crystals were grown by sitting-drop vapor diffusion with the crystallization solutions containing 100 mM sodium acetate, pH 4.6, 6% PEG 4000, and 0.17 mM n-dodecyl  $\beta$ -D-maltoside. The crystallization drop was a 1:1 mix between the crystallization solution and  $\sim$ 20 mg/mL KatG solution.

4. For X-ray diffraction experiments, single crystals were transferred into a cryo-solution for 10-20 seconds before being flash-frozen in liquid nitrogen in nylon loops (Hampton Research). The cryo-solutions were made by including 30% glucose as a cryoprotectant in the crystallization solutions. For the KatG[Asp137Ser] crystal, the diffraction data were collected at beam line X10SA at the SLS (Swiss-Light-Source), Villigen, Switzerland, while for the KatG[Arg418Leu] crystal, the diffraction data were collected at beamline ID29 at the ESRF (European Synchrotron Radiation Facility), Grenoble, France. Both data sets were collected at 100 K with a 6M Pilatus detector (DECTRIS, Ltd.). The diffraction data were processed and scaled with MOSFLM<sup>6</sup> and SCALA<sup>7</sup> or AIMLESS, and the space group was confirmed with POINTLESS through the CCP4 software suite<sup>8,9</sup>. The tetragonal structures have two KatG molecules in the asymmetric unit, and the structures were solved by molecular replacement with PHASER<sup>10</sup> based on the structure of WT *M.tb* KatG (PDB entry 2CCA). Refinement was performed through multiple cycles of restrained refinement in REFMAC<sup>11</sup> using NCS restraints, and model building and addition of water molecules in COOT.<sup>12</sup> No restraints were used for the Fe-N<sub>Heme</sub>, Fe-N<sub>His</sub>, Fe-H<sub>2</sub>O, C $\eta$ 2<sub>Tyr107</sub>-C $\epsilon$ 1<sub>Tyr229</sub> or C $\epsilon$ 2<sub>Tyr229</sub>-S $\delta$ <sub>Met255</sub> distances. The program RADDOSSE<sup>13,14</sup> was used to calculate the absorbed X-ray doses ( $\text{Gy} = \text{J}\cdot\text{kg}^{-1}$ ) of the different crystals during crystallographic data collection. The access channel in the KatG variants was calculated with HOLLOW<sup>15</sup> using a 1.4 Å probe radius. The backbone C $\alpha$  root mean square deviation (RMSD) values were calculated by use of PDBeFold (<http://www.ebi.ac.uk>) to be 0.33 Å between the WT KatG and KatG[Asp137Ser] structures and 0.35 Å between the WT KatG and KatG[Arg418Leu] structures. Structure figures were made using PyMOL.<sup>16</sup>

## References

1. S. Chouchane, I. Lippai and R. S. Magliozzo, *Biochemistry*, 2000, **39**, 9975-9983.
2. X. Zhao, H. Yu, S. Yu, F. Wang, J. C. Sacchettini and R. S. Magliozzo, *Biochemistry*, 2006, **45**, 4131-4140.
3. B. Lei, C. J. Wei and S. C. Tu, *J. Biol. Chem.*, 2000, **275**, 2520-2526.
4. R. Rawat, A. Whitty and P. J. Tonge, *Proc. Natl. Acad. Sci. U.S.A.*, 2003, **100**, 13881-13886.
5. X. Zhao, H. Yu, S. Yu, F. Wang, J. C. Sacchettini and R. S. Magliozzo, *Biochemistry*, 2006, **45**, 4131-4140.
6. A. G. W. Leslie and H. R. Powell, in *Evolving Methods for Macromolecular Crystallography*, eds. R. J. Read and J. L. Sussman, Springer Netherlands, 2007, pp. 41-51.
7. P. Evans, *Acta Crystallogr. Sect. D Biol. Crystallogr.*, 2006, **62**, 72-82.
8. M. D. Winn, C. C. Ballard, K. D. Cowtan, E. J. Dodson, P. Emsley, P. R. Evans, R. M. Keegan, E. B. Krissinel, A. G. W. Leslie, A. McCoy, S. J. McNicholas, G. N. Murshudov, N. S. Pannu, E. A. Potterton, H. R. Powell, R. J. Read, A. Vagin and K. S. Wilson, *Acta Crystallogr. Sect. D Biol. Crystallogr.*, 2011, **67**, 235-242.
9. E. Potterton, P. Briggs, M. Turkenburg and E. Dodson, *Acta Crystallogr. Sect. D Biol. Crystallogr.*, 2003, **59**, 1131-1137.
10. A. J. McCoy, R. W. Grosse-Kunstleve, P. D. Adams, M. D. Winn, L. C. Storoni and R. J. Read, *J. Appl. Cryst.*, 2007, **40**, 658-674.
11. G. N. Murshudov, P. Skubak, A. A. Lebedev, N. S. Pannu, R. A. Steiner, R. A. Nicholls, M. D. Winn, F. Long and A. A. Vagin, *Acta Crystallogr. Sect. D Biol. Crystallogr.*, 2011, **67**, 355-367.
12. P. Emsley, B. Lohkamp, W. G. Scott and K. Cowtan, *Acta Crystallogr. Sect. D Biol. Crystallogr.*, 2010, **66**, 486-501.
13. J. W. Murray, R. B. G. Ravelli and E. F. Garman, *J. Appl. Cryst.*, 2004, **37**, 513-522.
14. K. S. Paithankar and E. F. Garman, *Acta Crystallogr. Sect. D Biol. Crystallogr.*, 2010, **66**, 381-388.
15. B. Ho and F. Gruswitz, *BMC Struct. Biol.*, 2008, **8**, 49.
16. Schrodinger, LLC, *The PyMOL Molecular Graphics System, Version 1.3r1*, (2010).

**Table S1 – Crystal data, data collection and refinement statistics.**

| KatG                                                                                                | D137S                            | R418L                            |
|-----------------------------------------------------------------------------------------------------|----------------------------------|----------------------------------|
| <b>Crystal data</b>                                                                                 |                                  |                                  |
| Space group                                                                                         | P4 <sub>2</sub> 2 <sub>1</sub> 2 | P4 <sub>2</sub> 2 <sub>1</sub> 2 |
| <i>a</i> , <i>b</i> , <i>c</i> (Å)                                                                  | 150.6 / 150.6 / 157.4            | 150.7 / 150.7 / 157.1            |
| $\alpha\beta\gamma$ (°)                                                                             | 90 / 90 / 90                     | 90 / 90 / 90                     |
| Crystal size (μm <sup>3</sup> )                                                                     | 120×120×10                       | 100×70×15                        |
| <b>Data collection</b>                                                                              |                                  |                                  |
| X-ray source                                                                                        | SLS-X10SA                        | ESRF-ID29                        |
| Wavelength (Å)                                                                                      | 1.0000                           | 0.97627                          |
| Detector                                                                                            | Pilatus 6M                       | Pilatus 6M                       |
| Temperature (K)                                                                                     | 100                              | 100                              |
| Beam size (μm <sup>2</sup> )                                                                        | 100×100                          | 30×30                            |
| Flux (photons/sec)                                                                                  | 620·10 <sup>9</sup>              | 309·10 <sup>9</sup>              |
| Absorbed X-ray dose (MGy)                                                                           | 2.2                              | 19.8                             |
| Resolution range (Å)                                                                                | 75.3-2.5 / 2.56-2.50             | 44.1-3.10 / 3.27-3.10            |
| Completeness (%) <sup>*</sup>                                                                       | 99.9 / 100.0                     | 99.7 / 99.8                      |
| Redundancy <sup>*</sup>                                                                             | 6.2 / 6.5                        | 7.7 / 7.3                        |
| <i>I</i> /sd( <i>I</i> ) <sup>*</sup>                                                               | 8.7 / 3.9                        | 11.4 / 4.5                       |
| <i>R</i> <sub>sym</sub> <sup>*†</sup>                                                               | 13.0 / 38.7                      | 15.7 / 46.7                      |
| Total observations                                                                                  | 389770                           | 2588312                          |
| Unique reflections                                                                                  | 62942                            | 33364                            |
| Mosaicity                                                                                           | 0.42                             | 0.51                             |
| <b>Refinement Statistics</b>                                                                        |                                  |                                  |
| <i>R</i> <sub>work</sub> (%) <sup>†</sup>                                                           | 26.6                             | 16.3                             |
| <i>R</i> <sub>free</sub> (%) <sup>#</sup>                                                           | 31.1                             | 21.4                             |
| Mean overall isotropic B-factor (Å <sup>2</sup> )                                                   | 34.3                             | 39.7                             |
| Ramachandran plot: ration in most favoured / other allowed regions / generously allowed regions (%) | 88.8 / 10.9 / 0.2                | 87.1 / 12.1 / 0.8                |
| Estimated overall coordinate error based on <i>R</i> <sub>work</sub> / Maximum Likelihood (Å)       | 0.59 / 0.31                      | - / 0.28                         |
| RMSD bond (Å) / angles (°)                                                                          | 0.012 / 1.4                      | 0.012 / 1.5                      |
| Solvent content (%)                                                                                 | 56.3                             | 56.5                             |
| Molecules per asymmetric unit                                                                       | 2                                | 2                                |
| Added water molecules                                                                               | 82                               | 6                                |
| Volume not occupied by model (%)                                                                    | 46.6                             | 46.8                             |
| Unmodelled residues                                                                                 | 1-24                             | 1-23                             |
| PDB code                                                                                            | 4C50                             | 4C51                             |

<sup>\*</sup> The value before the backslash is for all data, and the value after the backslash is for the data in the highest resolution shell

<sup>†</sup>  $R_{\text{sym}} = \sum |I - \langle I \rangle| / \sum I$

<sup>†</sup>  $R_{\text{work}} = \sum (|F_{\text{obs}}| - |F_{\text{calc}}|) / \sum |F_{\text{obs}}|$

<sup>#</sup> *R*<sub>free</sub> is the *R*<sub>cryst</sub> calculated on the 5% reflections excluded for refinement.

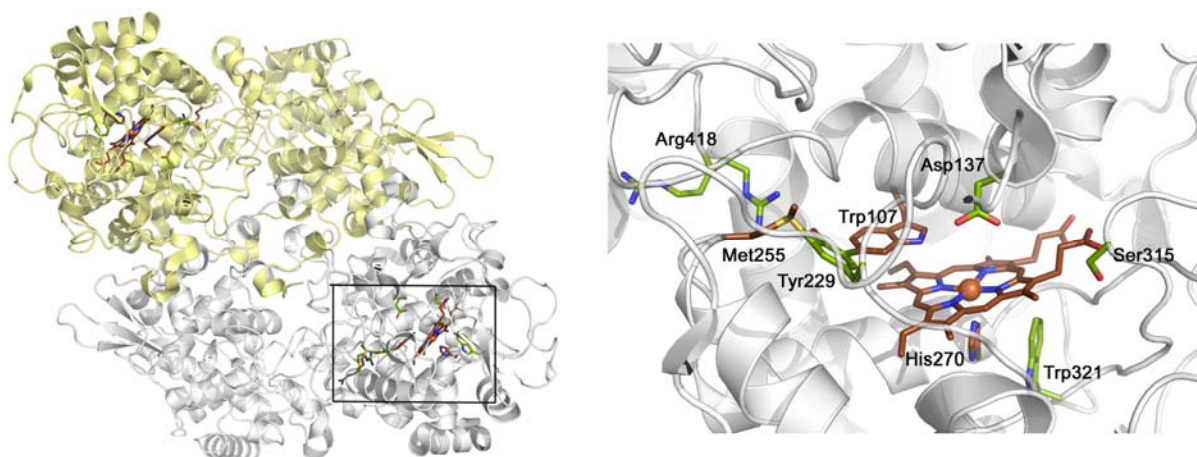

**Fig. S1.** Structure of the *M.tb* KatG dimer (2CCA.pdb) shown on the left. On the right, the residues mutated for this study are colored in green. The figure was generated using PyMOL.<sup>16</sup>

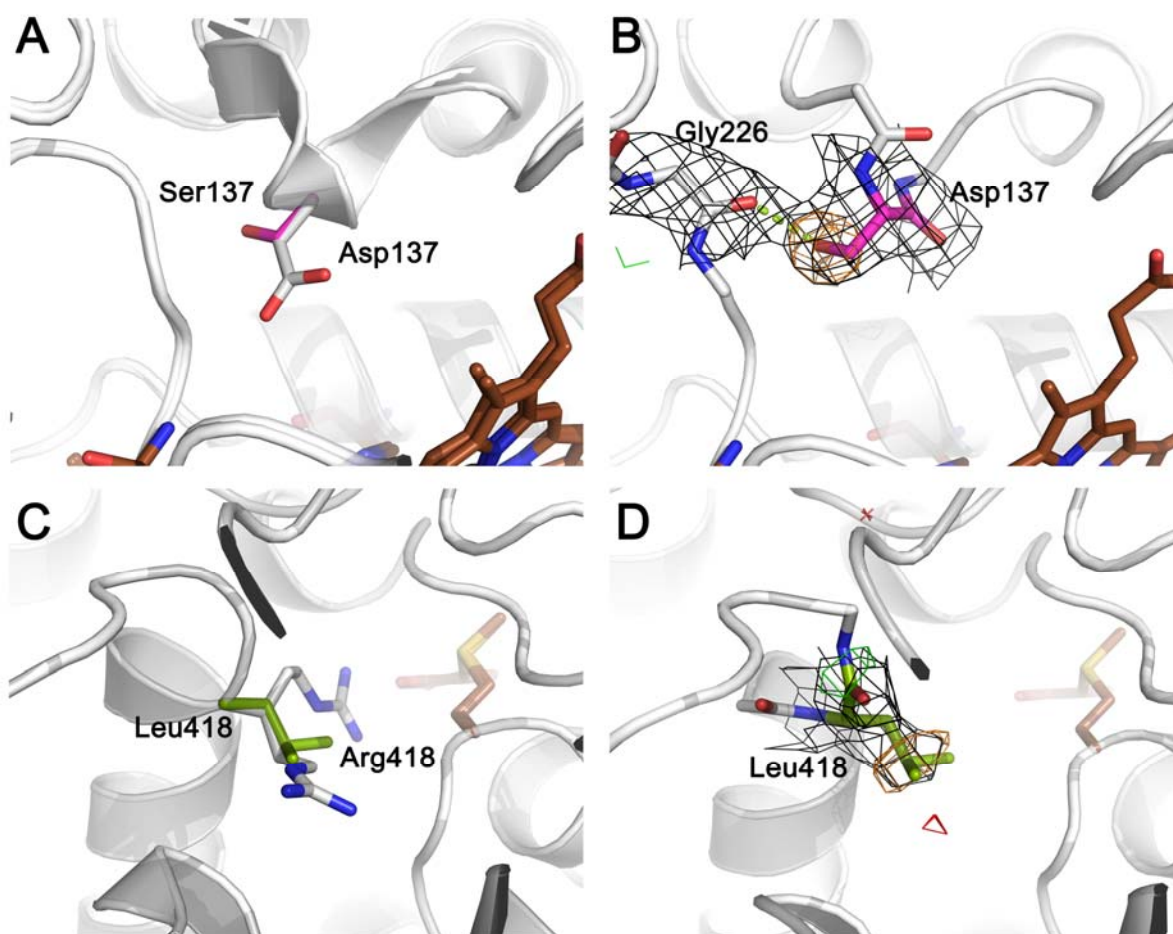

**Fig. S2.** Structures of the Asp137Ser and Arg418Leu mutants of *M.tb* KatG. **A.** Overlay of WT (2CCA.pdb) and Asp137Ser mutant structures; **B.** Asp137Ser mutant structure showing Ser137 and Gly226 with electron density; **C.** Overlay of WT (2CCA.pdb) and Arg418Leu mutant structures; **D.** Arg418Leu mutant structure showing Leu418 with electron density. The  $2F_o-F_c$  electron density maps (black) are contoured at  $+1\sigma$ , the  $F_o-F_c$  electron density difference maps are contoured at  $-3\sigma$  (red) and  $+3\sigma$  (green), and the  $F_o-F_c$  OMIT-map of the mutated residues are contoured at  $+4.7\sigma$  (orange). The figure was generated using PyMOL.<sup>16</sup>

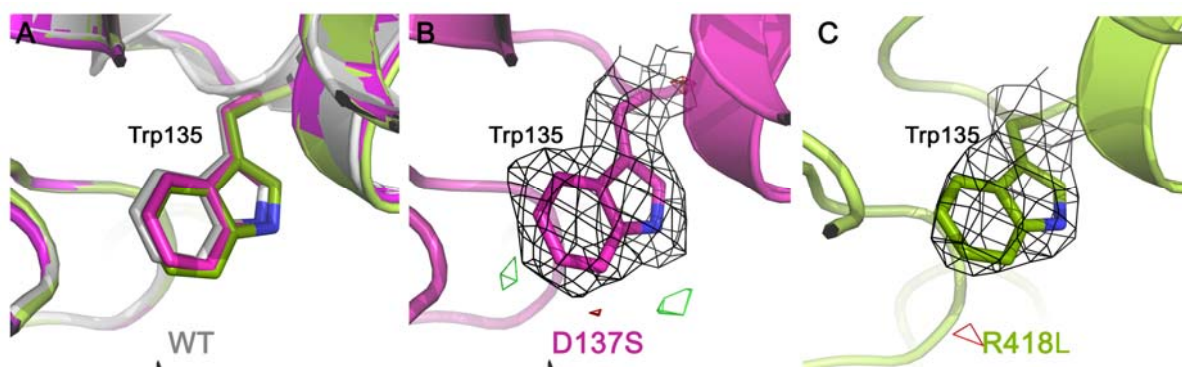

**Fig. S3.** Structures of *M.tb* WT KatG, KatG[Asp137Ser], and KatG[Arg418Leu] mutants showing the Trp135 residue. **A.** Overlay of WT (2CCA.pdb) and Asp137Ser and Arg418Leu structures; **B.** Asp137Ser mutant structure showing Trp135 with electron density; **C.** Arg418Leu mutant structure showing Trp135 with electron density. The  $2F_o-F_c$  electron density maps (black) are countered at  $+1\sigma$ , and the  $F_o-F_c$  electron density difference maps are contoured at  $-3\sigma$  (red) and  $+3\sigma$  (green). The figure was generated using PyMOL.<sup>16</sup>

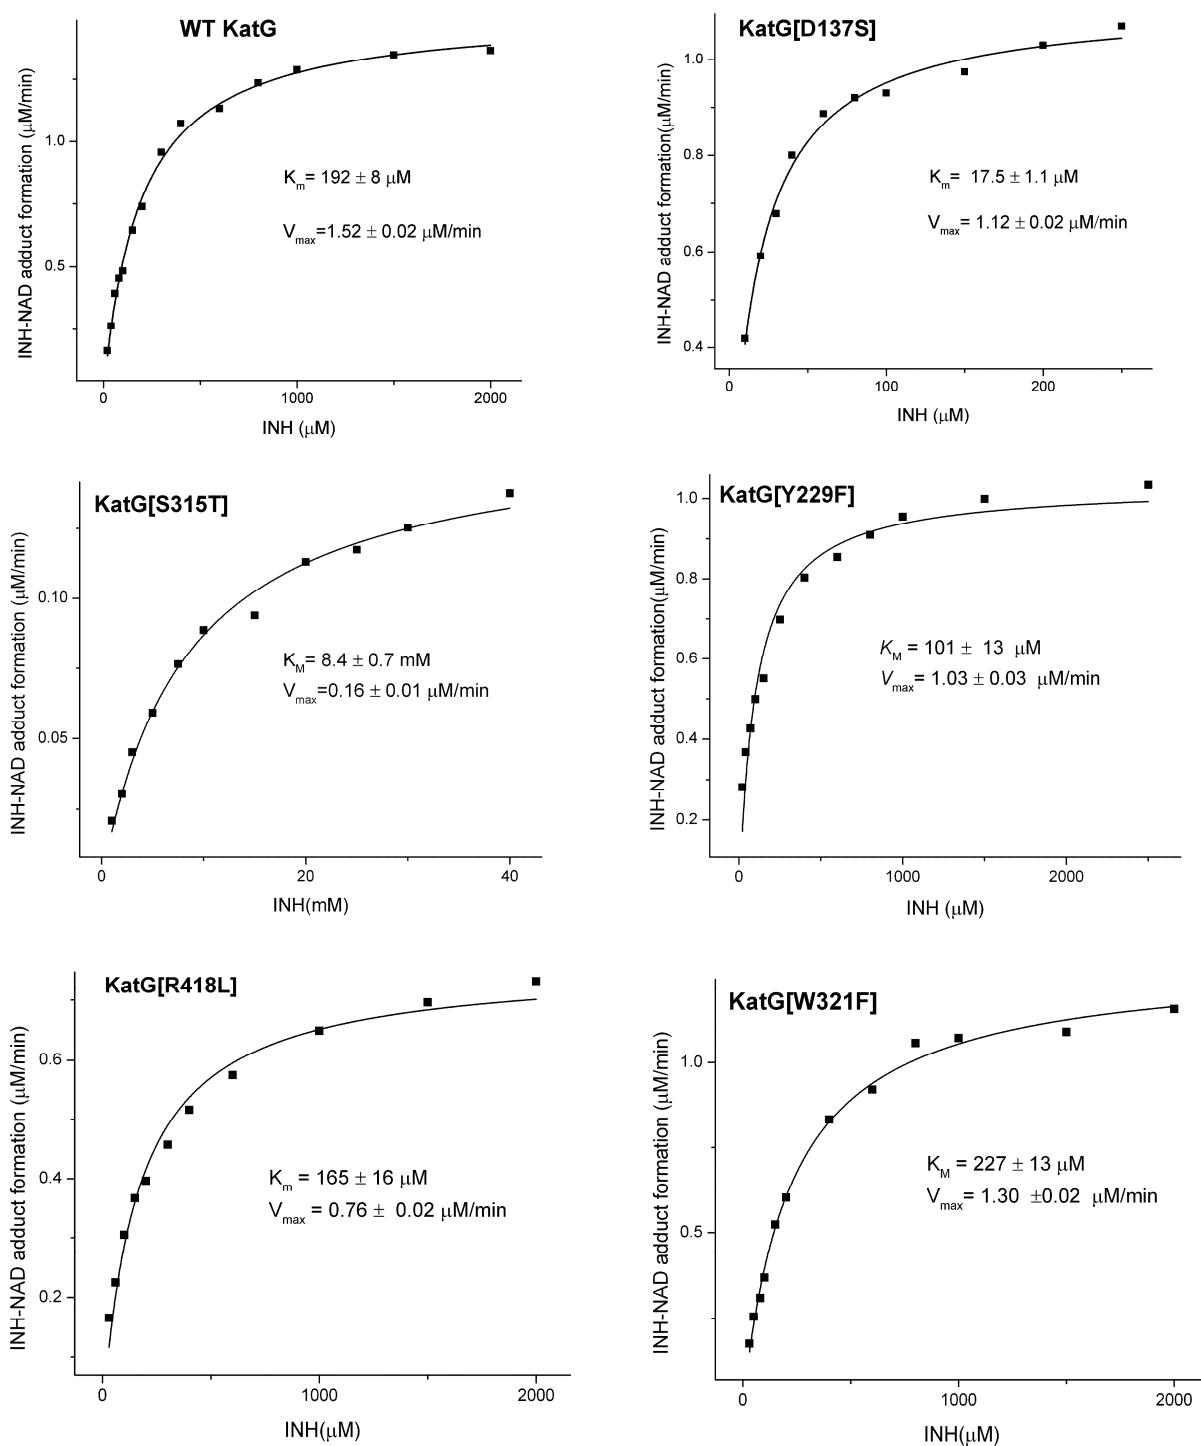

**Fig. S4.** Fitting of kinetics to Michaelis-Menten equation.
